# Supplementary material for: Sall1 is a transcriptional regulator defining microglia identity and function
Source: Springer Nature journal article supplement (doi:10.1038/ni.3585), 2016-10-24
Supplement: 41590_2016_BFni3585_MOESM45_ESM.pdf [file 41590_2016_BFni3585_MOESM45_ESM.pdf]

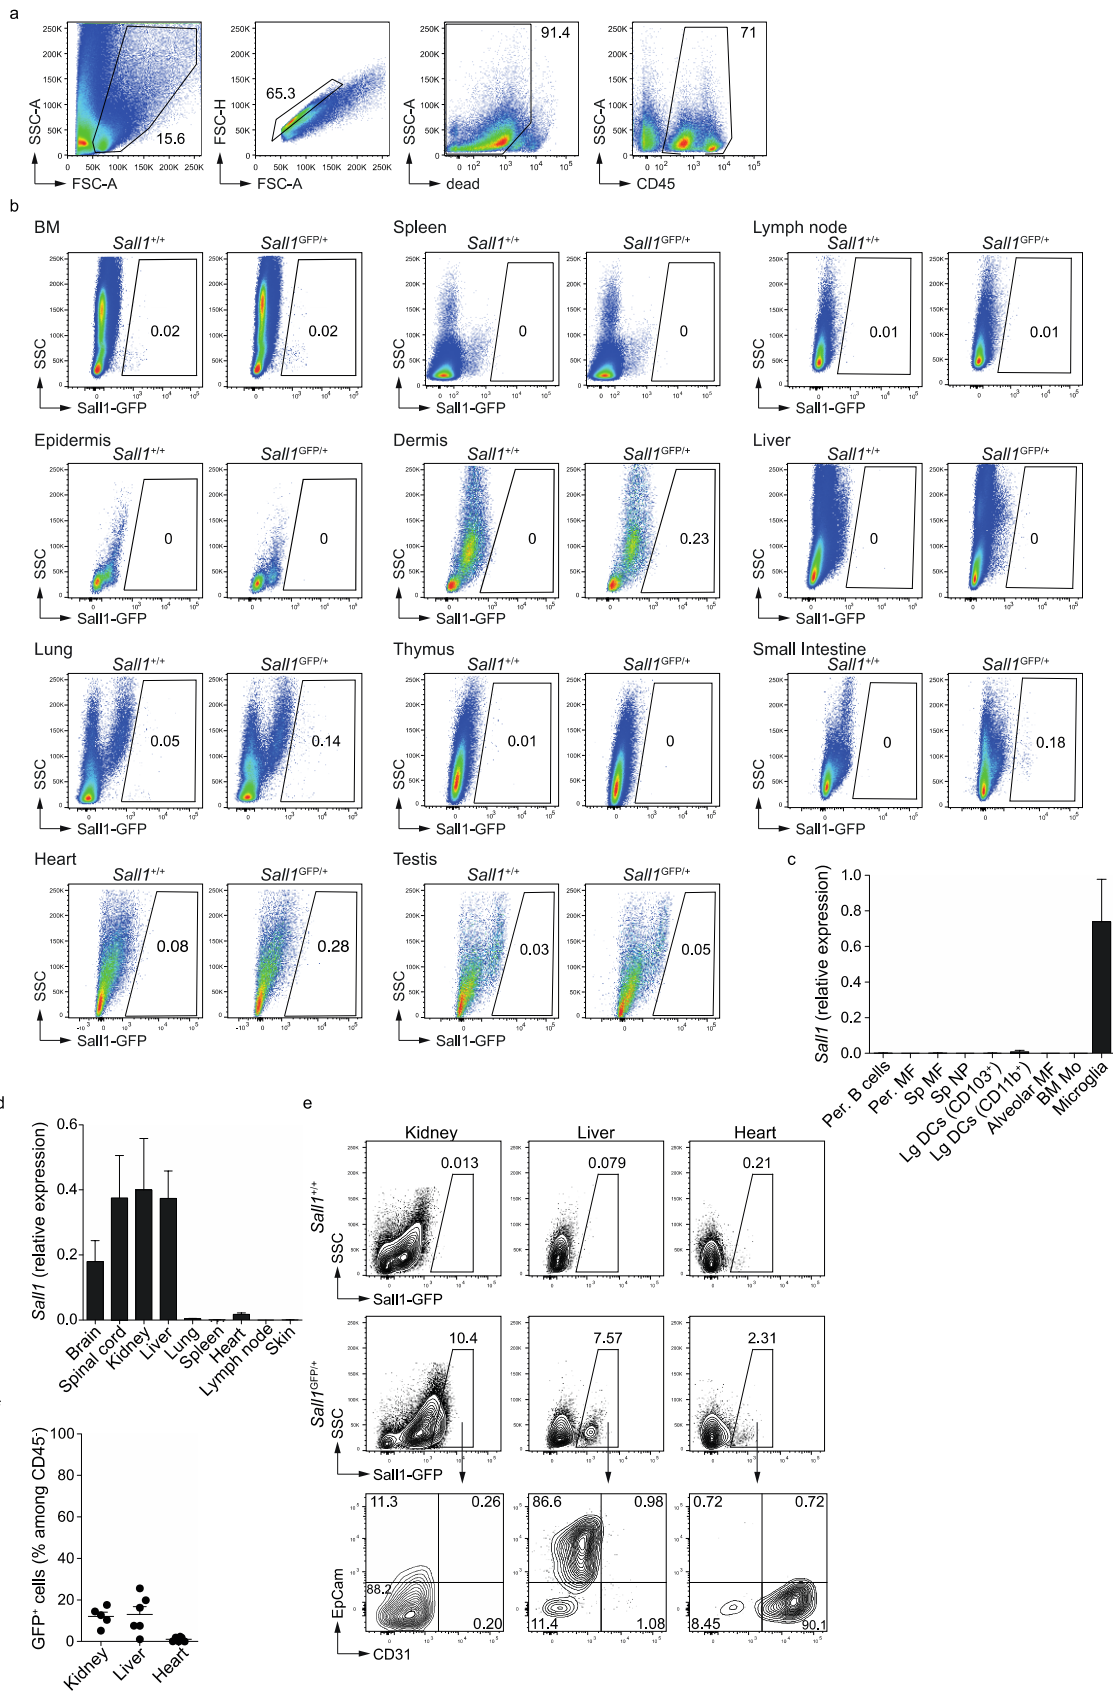

## Supplementary Figure 1

*Sall1* expression is restricted to microglia within the hematopoietic system.

**(a)** Flow cytometry plots show representative pre-gating strategy for CD45<sup>+</sup> cells (shown are CNS cells). **(b)** Flow cytometry analysis of GFP (*Sall1*) expression in different organs of *Sall1*<sup>GFP/+</sup> and *Sall1*<sup>+/+</sup> (control) mice (pre-gated on CD45<sup>+</sup> cells as in **a**). **(c)** qPCR analysis of *Sall1* mRNA in sorted cell populations derived from WT mice; results were normalized to *Pol2* expression. Alveolar MFs: CD45<sup>+</sup>Siglec-F<sup>+</sup>CD11c<sup>+</sup>, Lung CD11b<sup>+</sup> DCs: CD45<sup>+</sup>Siglec-F<sup>-</sup>CD11c<sup>+</sup>MHCII<sup>+</sup>CD11b<sup>+</sup>, Lung CD103<sup>+</sup> DCs: CD45<sup>+</sup>Siglec-F<sup>-</sup>CD11c<sup>+</sup>MHCII<sup>+</sup>CD103<sup>+</sup>, SP MF (spleen macrophages): F4/80<sup>hi</sup>CD11b<sup>+</sup>, SP NPs (spleen neutrophils): Ly6G<sup>+</sup>SSC<sup>hi</sup>, BM Mo (BM monocytes): Lin<sup>-</sup>CD11b<sup>+</sup>Ly6C<sup>+</sup>CD115<sup>+</sup>, microglia: CD45<sup>lo</sup>Ly6C<sup>-</sup>Ly6G<sup>-</sup>CD11b<sup>+</sup>F4/80<sup>+</sup>, Per. B cells (peritoneal B cells): B220<sup>+</sup>, Per. (peritoneal) MFs: CD115<sup>+</sup>CD11b<sup>+</sup>F4/80<sup>+</sup>. **(d)** qPCR analysis of *Sall1* mRNA in total tissue lysates of different organs; results were normalized to *Pol2* expression. **(e)** Representative flow cytometry plots of kidney, liver and heart of *Sall1*<sup>GFP/+</sup> mice (pre-gated on CD45<sup>-</sup> cells). **(f)** Quantification of results in **e**, presented as frequency of GFP<sup>+</sup> (*Sall1*) cells; each symbol represents an individual mouse; small horizontal lines indicate the mean ( $\pm$  s.e.m.). Data are representative of 2-4 mice per genotype, 2 experiments (**b**); 2 samples per population pooled from 2-3 WT mice, 2 experiments (**c**; mean  $\pm$  s.e.m.); 13 (spleen), 12 (brain), 11 (kidney, liver), 9 (spinal cord), 7 (lung, heart), 4 (skin), 3 (lymph node) WT mice, 2-5 experiments, 1 experiment (lymph node) (**d**; mean  $\pm$  s.e.m.); 6 (liver), 5 (kidney, heart) *Sall1*<sup>GFP/+</sup> mice, 2 experiments (**e,f**).

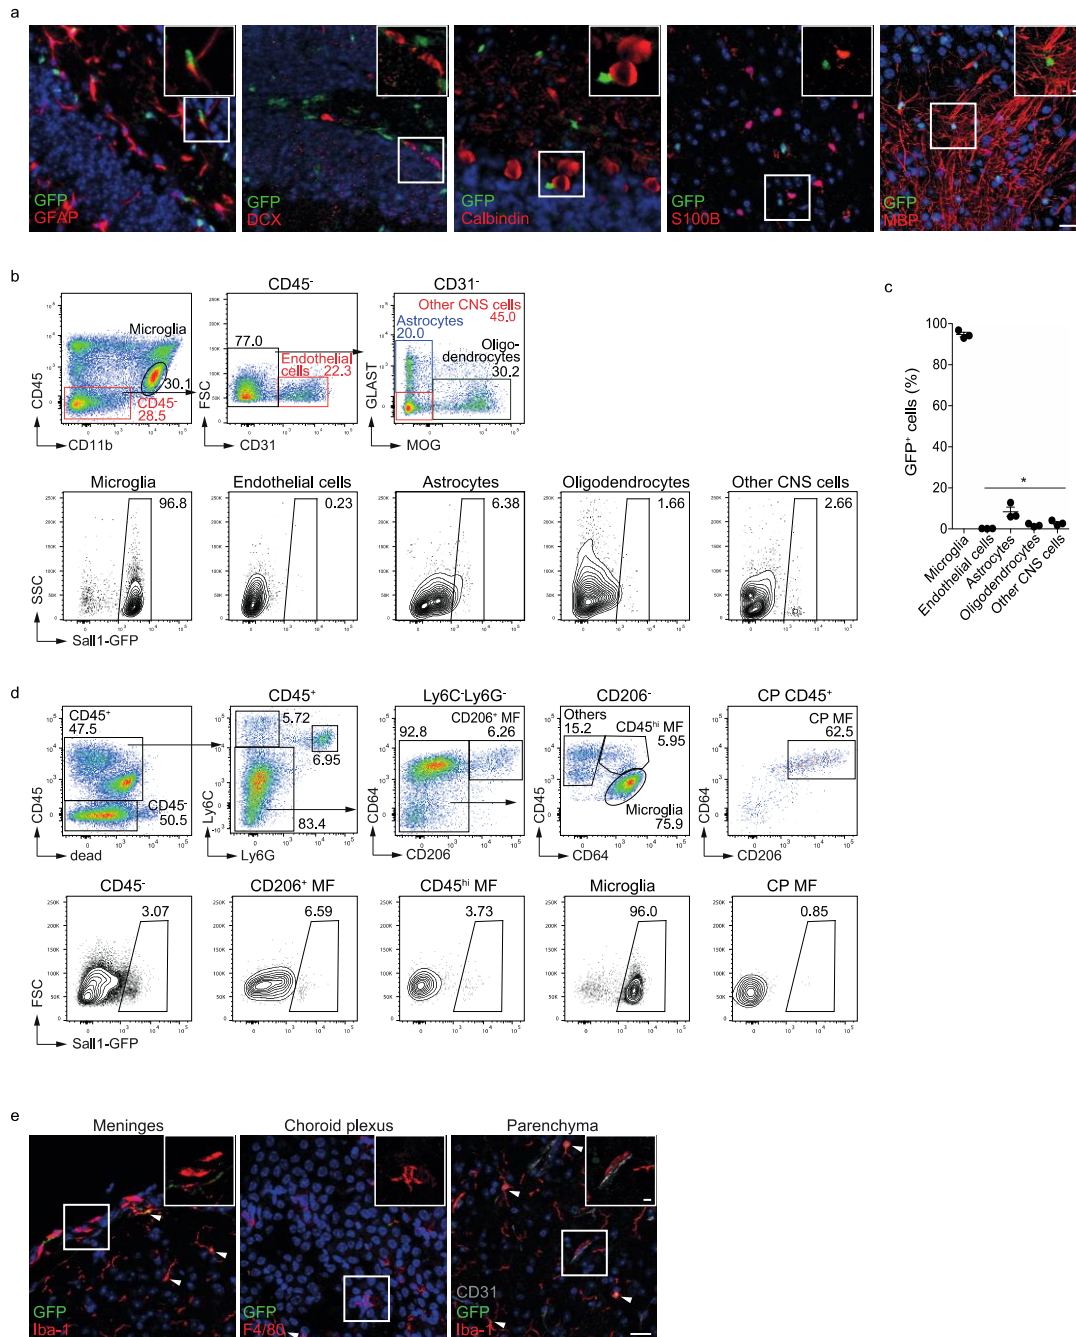

## Supplementary Figure 2

*Sall1* expression is specific to resident microglia within the adult CNS.

(a) IHC of brain sections of *Sall1*<sup>GFP/+</sup> mice, showing GFP (green), DAPI (blue), and GFAP (radial-glia-like stem cells), DCX (neuroblasts), Calbindin (Purkinje neurons), S100B (astrocytes) or MBP (oligodendrocytes) (red); insets (without DAPI; top right) are enlargements of the outlined areas in the main images. Scale bars, 20  $\mu$ m (main image) or 5  $\mu$ m (insets). (b) Gating strategy of non-hematopoietic (CD45<sup>-</sup>) CNS-resident cells and representative flow cytometry plots for their GFP expression in *Sall1*<sup>GFP/+</sup> mice. (c) Quantification of results in b, presented as frequency of GFP<sup>+</sup> cells. Each symbol represents an individual mouse; small horizontal lines indicate the mean ( $\pm$  s.e.m.). \**P* < 0.0001 (one-way ANOVA). (d) Gating strategy of CNS-resident myeloid cells and separately isolated choroid plexus (CP) cells. Representative flow cytometry plots display the percentage of GFP<sup>+</sup> cells in *Sall1*<sup>GFP/+</sup> mice. MF:

Macrophage. **(e)** IHC of brain sections of *Sall1*<sup>GFP/+</sup> mice, showing GFP (green), DAPI (blue), Iba-1 or F4/80 (microglia and CNS-MF) (red) and CD31 (endothelial cells) (gray); arrowheads indicate Iba-1 and GFP or F4/80 and GFP double-positive microglia; insets (without DAPI; top right) are enlargements of the outlined areas in the main images. Scale bars, 20  $\mu$ m (main image) or 5  $\mu$ m (insets). Data are representative of 2-3 mice per staining, 2 experiments **(a)**; 3 mice, 1 experiment **(b,c)**; 6 mice, 2 experiments **(d)**; 2-3 mice per staining, 2 experiments **(e)**.

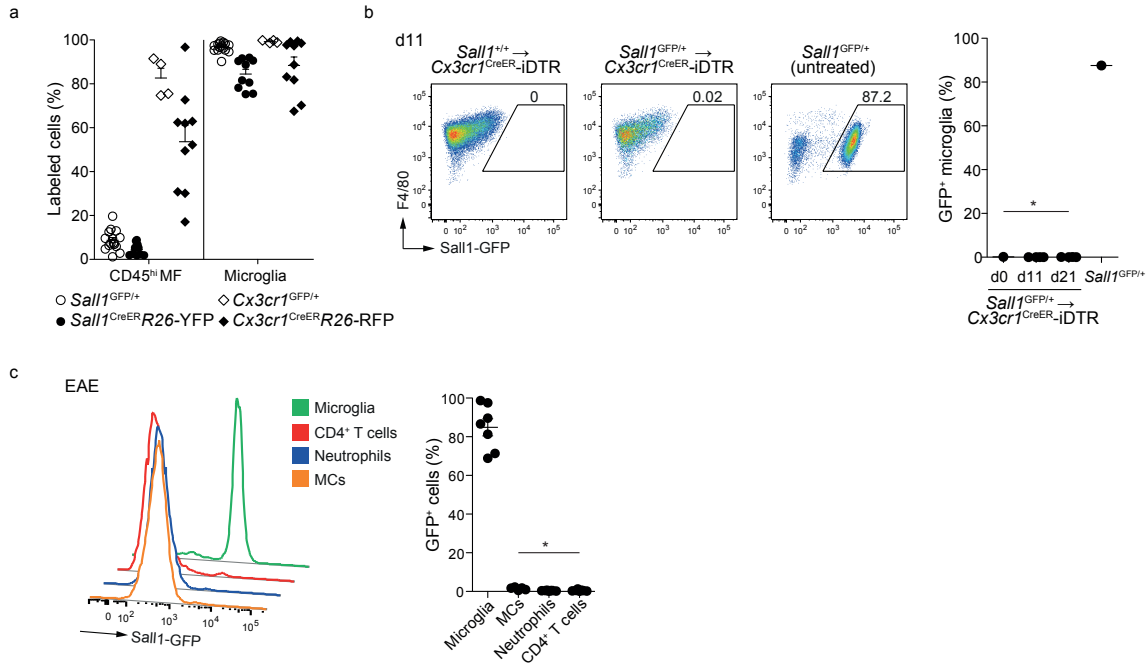

### Supplementary Figure 3

CNS-infiltrating myeloid cells and BM-derived microglia and/or macrophages do not express *Sall1*.

(a) Frequency of GFP<sup>+</sup> microglia and CD45<sup>hi</sup> MF of *Sall1*<sup>GFP/+</sup> and *Cx3cr1*<sup>GFP/+</sup> reporter mice and of YFP<sup>+</sup> or RFP<sup>+</sup> microglia and CD45<sup>hi</sup> MFs in tamoxifen treated *Sall1*<sup>CreER</sup>R26-YFP or *Cx3cr1*<sup>CreER</sup>R26-RFP mice. Microglia: CD45<sup>lo</sup>CD11b<sup>+</sup>F4/80<sup>+</sup>Ly6C<sup>-</sup>Ly6G<sup>-</sup>, CD45<sup>hi</sup> MFs: CD45<sup>hi</sup>CD11b<sup>+</sup>F4/80<sup>+</sup>Ly6C<sup>-</sup>Ly6G<sup>-</sup>. (b) Flow cytometry analysis and quantification of the frequency of GFP<sup>+</sup> microglia in tamoxifen- and diphtheria toxin-treated *Sall1*<sup>+/+</sup>(CD45.1)→*Cx3cr1*<sup>CreER</sup>-iDTR(CD45.2) or *Sall1*<sup>GFP/+</sup>(CD45.1)→*Cx3cr1*<sup>CreER</sup>-iDTR(CD45.2) BM chimeras on day 0, 11 and 21 after treatment (pre-gated on CD11b<sup>+</sup>F4/80<sup>+</sup>CD45.1<sup>lo</sup>Ly6C<sup>-</sup>Ly6G<sup>-</sup> cells) or in untreated *Sall1*<sup>GFP/+</sup> (control) mice. (c) Representative histograms and quantification of GFP expression in monocyte-derived cells (MCs) (gated on CD45<sup>hi</sup>CD11b<sup>+</sup>CD11c<sup>+</sup>MHCII<sup>+</sup>Ly6C<sup>+</sup>), neutrophils (gated on CD45<sup>hi</sup>CD11b<sup>+</sup>Ly6G<sup>+</sup>), CD4<sup>+</sup> T cells (gated on CD45<sup>hi</sup>CD11b<sup>-</sup>CD4<sup>+</sup>) and microglia (gated on CD45<sup>lo</sup>Ly6C<sup>-</sup>Ly6G<sup>-</sup>CD11b<sup>+</sup>) in *Sall1*<sup>GFP/+</sup> mice at peak disease of MOG<sub>35-55</sub>/CFA-induced EAE. Each symbol (a-c) represents an individual mouse; small horizontal lines (a-c) indicate the mean (± s.e.m.). \**P* < 0.0001 (one-way ANOVA). Data are representative of 15 (*Sall1*<sup>GFP/+</sup>), 10 (*Sall1*<sup>CreER</sup>R26-YFP, *Cx3cr1*<sup>CreER</sup>R26-RFP), 4 (*Cx3cr1*<sup>GFP/+</sup>) mice, at least 2 experiments (a); 4 mice (d11, d21), 2 experiments and 1 mouse (d0, untreated *Sall1*<sup>GFP/+</sup>) (b); 7 (microglia), 5 (MCs, Neutrophils, CD4<sup>+</sup> T cells) mice, 3 experiments (c).

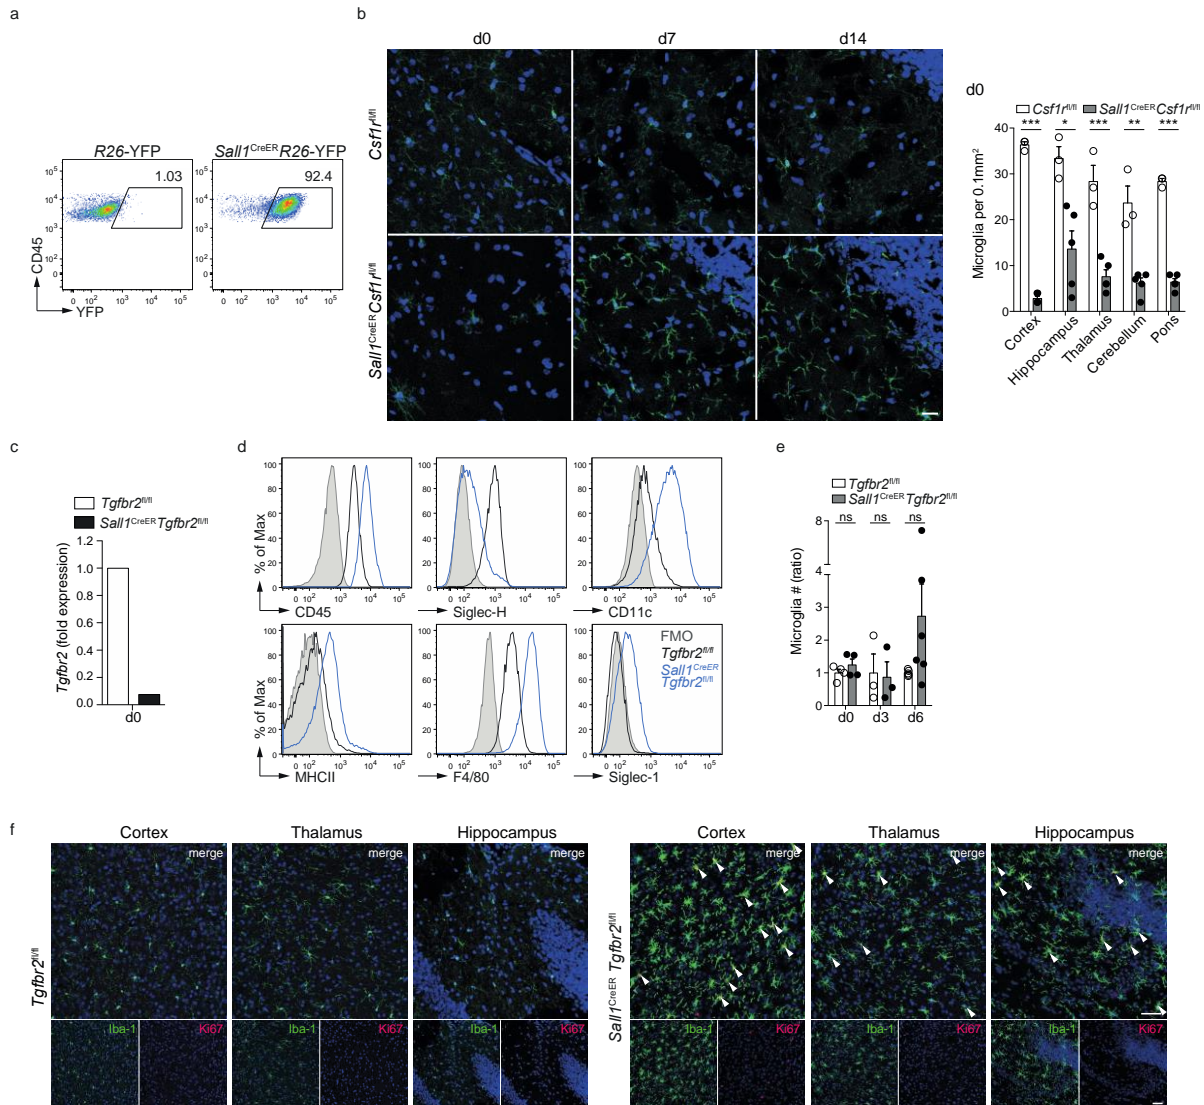

## Supplementary Figure 4

Microglia-specific targeting utilizing *Sall1*<sup>CreER</sup> mice.

**(a)** Flow cytometry analysis of *Sall1*<sup>CreER</sup> R26-YFP mice and R26-YFP (control) littermates on day 3 after 5 consecutive days of tamoxifen treatment, showing the frequency of YFP<sup>+</sup> microglia (pre-gated on CD45<sup>lo</sup> Ly6G<sup>-</sup> Ly6C<sup>-</sup> CD11b<sup>+</sup>). **(b)** IHC of cortical brain sections of *Sall1*<sup>CreER</sup> *Csf1*<sup>fl/fl</sup> and *Csf1*<sup>fl/fl</sup> mice at day 0, 7 and 14 after 5 consecutive days of tamoxifen treatment, showing Iba-1 (microglia) (green) and DAPI (blue). Scale bar, 20  $\mu$ m. Quantification shows microglia counts in different brain areas at day 0 after tamoxifen treatment. **(c)** qPCR analysis of *Tgfb2* mRNA in microglia sorted from *Sall1*<sup>CreER</sup> *Tgfb2*<sup>fl/fl</sup> and *Tgfb2*<sup>fl/fl</sup> mice on day 0 after three consecutive days of tamoxifen treatment; results were normalized to *Pol2* expression. **(d)** Histograms display the expression of different surface markers vs. FMO on microglia of *Sall1*<sup>CreER</sup> *Tgfb2*<sup>fl/fl</sup> and *Tgfb2*<sup>fl/fl</sup> mice as in **(c)** on day 6 after tamoxifen treatment. **(e)** Quantification of microglia numbers in *Sall1*<sup>CreER</sup> *Tgfb2*<sup>fl/fl</sup> and *Tgfb2*<sup>fl/fl</sup> mice as in **(c)** on day 0, 3 and 6 after tamoxifen treatment. Numbers are displayed as ratios to control (*Tgfb2*<sup>fl/fl</sup>) mice. **(f)** IHC of brain sections from *Sall1*<sup>CreER</sup> *Tgfb2*<sup>fl/fl</sup> and *Tgfb2*<sup>fl/fl</sup> mice as in **(c)** analyzed on day 3 after tamoxifen treatment, showing Iba-1 (green), Ki67 (red) and DAPI (blue). Arrowheads indicate Iba-1 and Ki67 double-positive cells. Scale bar, 50  $\mu$ m. Each symbol (**(b,e)**) represents an individual mouse. ns = not significant, \*  $p < 0.05$ , \*\*  $p < 0.01$ , \*\*\*  $p < 0.001$  (unpaired *t*-test). Data are representative of 10 mice, 5 experiments (**(a)**); 3-5 sections of 2 mice, 2 experiments (**(b)**; mean  $\pm$  s.e.m.); 1 pooled sample of 3-4 mice per genotype (**(c)**); 2-5 mice per genotype, at least 2

experiments (**d**); 4 (d0), 3 (d3), 5-6 (d6) mice, 2 experiments (**e**; mean  $\pm$  s.e.m.); 1-2 mice per genotype (**f**).

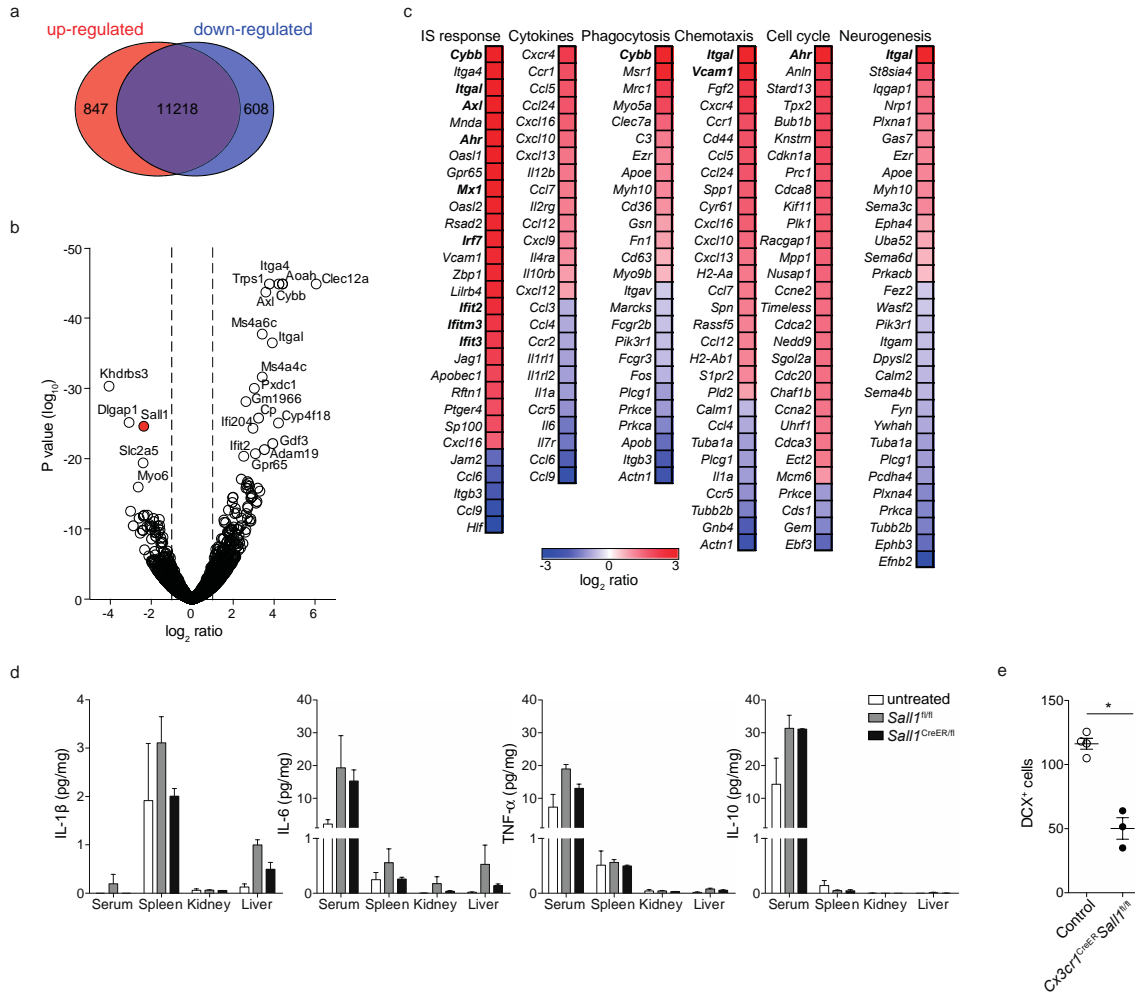

## Supplementary Figure 5

Gene expression profile of *Sall1*-deficient microglia.

**(a-c)** Gene expression analysis of microglia sorted from *Sall1*<sup>CreER/fl</sup> and *Sall1*<sup>fl/fl</sup> mice on day 1 after 5 times of tamoxifen treatment every second day as described in **Figure 4**. **(a)** Venn diagram of differentially expressed genes. **(b)** Volcano plot showing  $\log_2$  ratios vs. p values ( $\log_{10}$ ) of all 12,673 detected genes. Genes with highest significance values are annotated. **(c)** Expression ( $\log_2$  ratio) of *Sall1*-regulated genes clustered according to their indicated GO-pathways; IS, Immune system; (bold indicates genes discussed in Results). **(d)** Multiplex immunoassays show levels (pg/mg) of IL-1, IL-6, TNF- $\alpha$  and IL-10 in serum and whole tissue lysates of spleen, kidney and liver of untreated (control) mice and *Sall1*<sup>CreER/fl</sup> and *Sall1*<sup>fl/fl</sup> mice at day 6 after start of tamoxifen treatment. **(e)** Graph displays cell counts of DCX<sup>+</sup> neuroblasts in hippocampal brain sections of tamoxifen treated *Cx3cr1*<sup>CreER</sup>*Sall1*<sup>fl/fl</sup> and Cre<sup>-</sup> (control) littermates; each symbol represents an individual mouse; small horizontal lines indicate the mean ( $\pm$  s.e.m.). \* p = 0.0006 (unpaired *t*-test). Data are representative of 3-5 mice pooled per genotype and biological replicate, 3 experiments **(a-c)**; 3 (*Sall1*<sup>CreER/fl</sup>, *Sall1*<sup>fl/fl</sup>), 2 (untreated) mice, 1 experiment **(d)**; mean  $\pm$  s.e.m.); 3 (*Cx3cr1*<sup>CreER</sup>*Sall1*<sup>fl/fl</sup>), 4 (control) mice, 2 experiments **(e)**.
